# Supplementary material
Source: Springer Nature journal article supplement (https://www.springermedizin.de/resource/supplementary/13045_2011_155_MOESM2_ESM.pdf/9660760)

(a) Chromatin Immunoprecipitation (ChIP) with CREB1 antibody

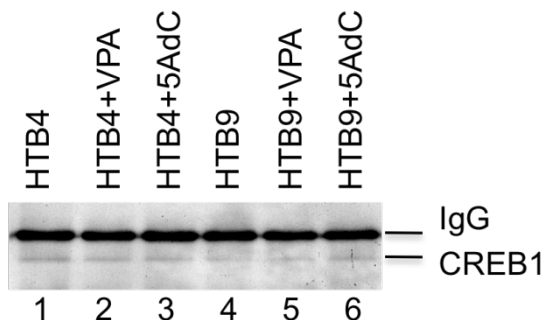

(b) Chromatin Immunoprecipitation (ChIP) with Sp1 antibody

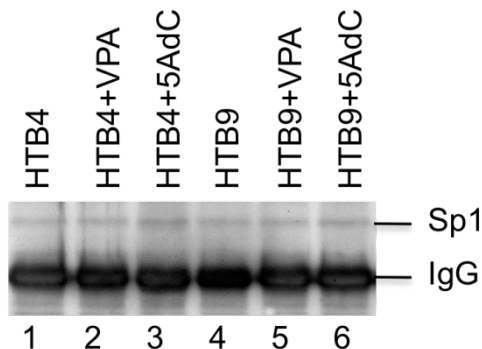

Supplement: MOESM2 [file 9660760]
